# Supplementary material for: Likely substantial underestimation of reported methane emissions from United Kingdom upstream oil and gas activities
Source: Royal Society of Chemistry journal article supplement (doi:10.1039/d2ee03072a), 2022-12-22
Supplement: d2ee03072a1.pdf [file d2ee03072a1.pdf]

1

## **Supplementary Materials**

2

3

4

### **Likely underestimation of reported methane emissions**

5

### **from UK upstream oil and gas activities**

6

## 7 Supplementary Material Section 1 - Offshore oil and gas extraction processes

8 Offshore production platforms extract an oil/gas/water mixture from beneath the seabed and pass  
9 this mixture into 2-phase separators, where gas is mostly separated from oil and water. Oil and  
10 water are then separated from each other and the remaining gas in 3-phase separators (Figure  
11 SM1). Natural gas from the 3-stage separator (flash gas) is injected into the export line via a vapor  
12 recovery unit (VRU), the gas then passes through export compressors (typically around ten 1,000  
13 hp dry seal, electric start centrifugal engines) and a glycol dehydrator before being transported to  
14 shore in high pressure (> 100 psi) pipelines. Flash-gas is spontaneous vapor produced from the  
15 depressurization of the extracted oil mixture during separation. Ideally, all gas lost through the  
16 seal vents of the compressors and the dehydrators is sent to a low-pressure (LP) flare. When any  
17 of the export compressors are blown down or the VRU is offline, gas is sent to the high-pressure  
18 (HP) flare. In the event of excessive pressure, pressure release valves will also route gas to the HP  
19 flare.

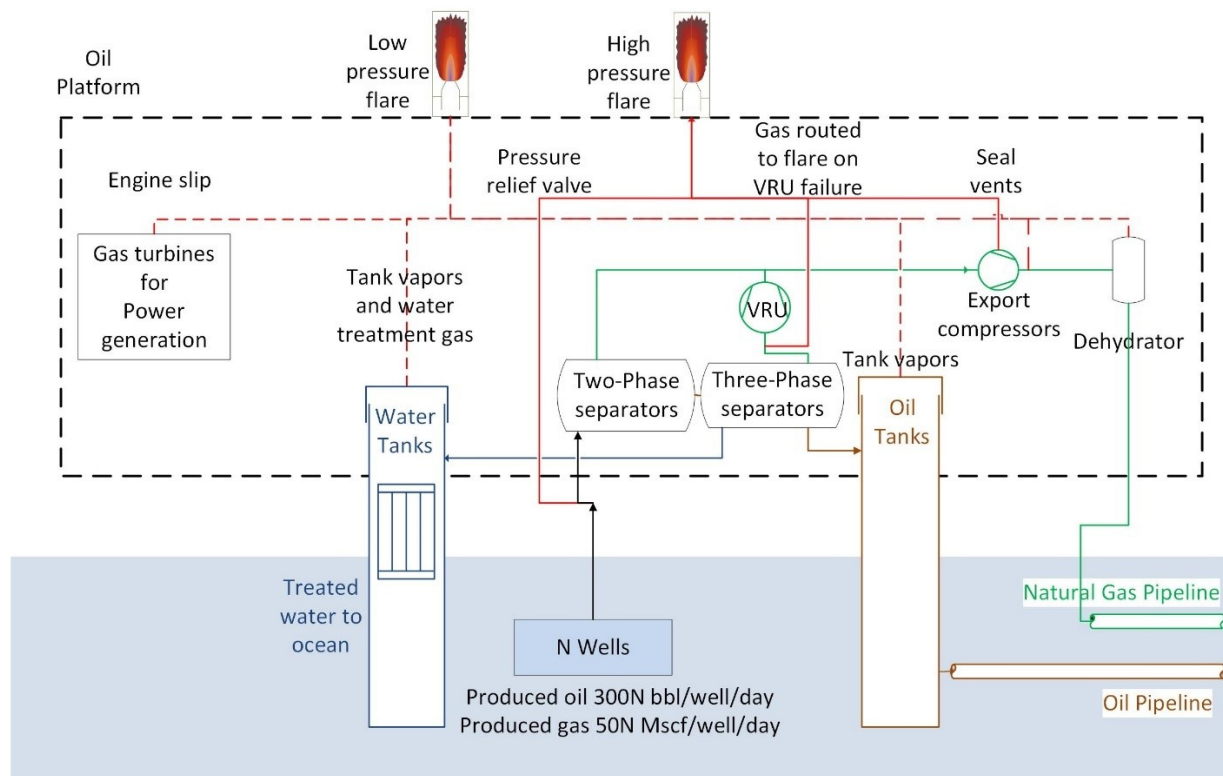

20

21 *Figure S1 Production platform schematic. Shown here are major equipment components which can be*  
22 *sites of potential emissions.*

23

24 Produced oil and water are stored in separate tanks that act as ballast for the platform. Oil is  
25 generally transported to shore via pipeline, while water is treated and then transferred back to the  
26 ocean. Any gas in the tank headspace is routed to the LP flare. Ideally, all pneumatics are  
27 controlled by compressed air instead of NG and any combustion slip from the gas turbines used to  
28 power the platform is also routed to the LP flare. Combustion slip is where unburned CH<sub>4</sub> is  
29 entrained in exhaust from natural gas-fired compressor engines

30

31

32 **Supplementary Material Section 2 – NAEI emission factors in 2019**

33

34 *Table S1*

| NFR Code                           | Source                              | Fuel Name    | Emission Factor<br>(kilotonne) | Activity Units |
|------------------------------------|-------------------------------------|--------------|--------------------------------|----------------|
| 1B2b4_Gas_transmission_and_storage | Natural Gas leakage                 | Transmission | 0.818141698                    | kt NG leaked   |
| 1B2c_Flaring_Oil                   | Upstream Oil - flaring              | Combustion   | 1.08E-05                       | t              |
| 1A1cii_Oil_and_gas_extraction      | Upstream Oil - fuel combustion      | Gas oil      | 2.44E-06                       | TJ (net)       |
| 1A1cii_Oil_and_gas_extraction      | Upstream Oil - fuel combustion      | Natural gas  | 1.83E-05                       | TJ (net)       |
| 1B2a3_Oil_transport                | Upstream Oil - Onshore Oil Loading  | Crude oil    | 6.57E-09                       | t              |
| 1B2a3_Oil_transport                | Upstream Oil - Offshore Oil Loading | Crude oil    | 4.48E-08                       | t              |
| 1B2c_Flaring_Gas                   | Upstream Gas - flaring              | Combustion   | 1.08E-05                       | t              |
| 1A1cii_Oil_and_gas_extraction      | Upstream Gas - fuel combustion      | Gas oil      | 3.40E-06                       | TJ (net)       |
| 1A1cii_Oil_and_gas_extraction      | Upstream Gas - fuel combustion      | Natural gas  | 2.84E-05                       | TJ (net)       |

35

36 **Supplementary Material Section 3 - Global distribution of offshore facilities in 2018**

37

38 *Table S2*

| Region                              | 2018 Number of offshore platforms <sup>1</sup> |
|-------------------------------------|------------------------------------------------|
| Gulf of Mexico                      | 175                                            |
| North Sea                           | 184                                            |
| Southeast Asia                      | 152                                            |
| Far East Asia                       | 155                                            |
| Persian Gulf                        | 159                                            |
| Mexico                              | 88                                             |
| Brazil                              | 51                                             |
| Western Africa                      | 75                                             |
| Venezuela                           | 46                                             |
| Caspian Sea                         | 37                                             |
| Rest of US                          | 28                                             |
| Mediterranean                       | 26                                             |
| Rest of South America and Caribbean | 30                                             |
| Black Sea                           | 18                                             |
| Australia                           | 11                                             |
| Red Sea                             | 17                                             |
| Canadian Atlantic                   | 7                                              |
| Alaska                              | 5                                              |
| Rest of Africa                      | 5                                              |
| Eastern Europe                      | 3                                              |
| Canadian Arctic                     | 1                                              |
| Canadian Pacific                    | 1                                              |

39

40

41 **Supplementary Material Section 4 – Regional variability in offshore venting and flaring and**  
 42 **LDAR regulations**

43 *Table S3 Regional variability in offshore venting and flaring and LDAR regulations. P(%) refers to the percentage of global*  
 44 *offshore platforms, R is if there a requirement for reporting of gas flared, Per - require permission to flare, Res - flaring*  
 45 *restrictions, Pen - flaring penalties, V - Venting regulations , and LDAR – is leak detection and repair required.*

| Region                  | P (%) | R   | Per | Res | Pen | V   | LDAR | Category |
|-------------------------|-------|-----|-----|-----|-----|-----|------|----------|
| Asia & Australasia      | 31    | No  | No  | No  | No  | No  | No   | 3        |
| North & Central America | 24    | Yes | Yes | Yes | Yes | Yes | Yes  | 1        |
| Europe                  | 17    | Yes | Yes | Yes | Yes | Yes | Yes  | 1        |
| Middle East             | 12    | No  | Yes | No  | No  | No  | No   | 3        |
| South America           | 10    | No  | Yes | Yes | Yes | No  | No   | 2        |
| Africa                  | 6     | No  | Yes | No  | No  | No  | No   | 3        |

46

47

48 REFERENCES

49

50 1. Statista. Number of offshore rigs worldwide as of January 2018 by region.

51 <https://www.statista.com/statistics/279100/number-of-offshore-rigs-worldwide-by-region/>.

52 Accessed 28/12/21. (2021).

53
